# Supplementary material for: Alteplase for Acute Ischemic Stroke in Patients Aged >80 Years: Pooled Analyses of Individual Patient Data
Source: PubMed Central journal article supplement — Stroke. 2020 Jul 2;51(8):2322–31. doi: 10.1161/STROKEAHA.119.028396 (PMC7382542; doi:10.1161/strokeaha.119.028396), 2020-07-02
Supplement: str-51-2322-s002.pdf [file str-51-2322-s002.pdf]

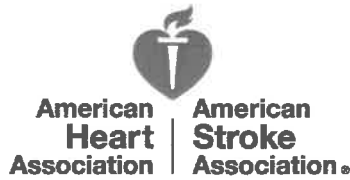

## Acknowledgment Permission Form

---

**Journal** Stroke

**Manuscript Number** TBC

**First Author** Erich Bluhmki PhD

**Title of Work** Alteplase for Acute Ischemic Stroke in Patients Aged >80 Years: Pooled Analyses of Individual Patient Data

Authors must provide written permission/approval from all individuals mentioned by name in the Acknowledgments section of a submitted manuscript. By signing this form, any and all acknowledged persons therefore state that they have read and approved the mention of their names in the Acknowledgment section of the aforementioned paper.

|           |                              |           |                                                                                           |      |                   |
|-----------|------------------------------|-----------|-------------------------------------------------------------------------------------------|------|-------------------|
| Name (1)  | <u>Dr Hannah Wills MBChB</u> | Signature | <u></u> | Date | <u>13/11/2019</u> |
| Name (2)  | <u></u>                      | Signature | <u></u>                                                                                   | Date | <u></u>           |
| Name (3)  | <u></u>                      | Signature | <u></u>                                                                                   | Date | <u></u>           |
| Name (4)  | <u></u>                      | Signature | <u></u>                                                                                   | Date | <u></u>           |
| Name (5)  | <u></u>                      | Signature | <u></u>                                                                                   | Date | <u></u>           |
| Name (6)  | <u></u>                      | Signature | <u></u>                                                                                   | Date | <u></u>           |
| Name (7)  | <u></u>                      | Signature | <u></u>                                                                                   | Date | <u></u>           |
| Name (8)  | <u></u>                      | Signature | <u></u>                                                                                   | Date | <u></u>           |
| Name (9)  | <u></u>                      | Signature | <u></u>                                                                                   | Date | <u></u>           |
| Name (10) | <u></u>                      | Signature | <u></u>                                                                                   | Date | <u></u>           |
| Name (11) | <u></u>                      | Signature | <u></u>                                                                                   | Date | <u></u>           |
| Name (12) | <u></u>                      | Signature | <u></u>                                                                                   | Date | <u></u>           |
| Name (13) | <u></u>                      | Signature | <u></u>                                                                                   | Date | <u></u>           |
| Name (14) | <u></u>                      | Signature | <u></u>                                                                                   | Date | <u></u>           |
| Name (15) | <u></u>                      | Signature | <u></u>                                                                                   | Date | <u></u>           |
| Name (16) | <u></u>                      | Signature | <u></u>                                                                                   | Date | <u></u>           |
| Name (17) | <u></u>                      | Signature | <u></u>                                                                                   | Date | <u></u>           |
| Name (18) | <u></u>                      | Signature | <u></u>                                                                                   | Date | <u></u>           |
| Name (19) | <u></u>                      | Signature | <u></u>                                                                                   | Date | <u></u>           |
| Name (20) | <u></u>                      | Signature | <u></u>                                                                                   | Date | <u></u>           |
